# Supplementary material for: Synergistic effect of CoPi-hole and Cu(ii)-electron cocatalysts for enhanced photocatalytic activity and photoinduced stability of Ag3PO4
Source: Royal Society of Chemistry journal article supplement (doi:10.1039/c7cp01043e), 2017-01-01
Supplement: c7cp01043e1.pdf [file c7cp01043e1.pdf]

## **Supporting information**

# **Synergistic effect of CoPi-hole cocatalyst and Cu(II)-electron cocatalyst for enhanced photocatalytic activity and photoinduced stability of $\text{Ag}_3\text{PO}_4$**

Ping Wang,<sup>a</sup> Shunqiu Xu,<sup>a</sup> Yang Xia,<sup>a</sup> Xuefei Wang,<sup>a</sup> Huogen Yu<sup>\*a</sup>, Jiaguo Yu<sup>b</sup>

<sup>a</sup> School of Chemistry, Chemical Engineering and Life Science, Wuhan University of Technology, Wuhan 430070, People's Republic of China

<sup>b</sup> State Key Laboratory of Advanced Technology for Material Synthesis and Processing, Wuhan University of Technology, Wuhan 430070, People's Republic of China

Tel: 0086-27-87871029, Fax: 0086-27-87879468

E-mail: yuhuogen@whut.edu.cn

## **EXPERIMENTAL SECTION**

### **1 CoPi/AgCl**

#### **1.1 Preparation of AgCl**

AgCl particles were synthesized by a facile precipitation reaction. In a typical synthesis, a 72 mL of AgNO<sub>3</sub> solution (0.1 mol L<sup>-1</sup>) was added with drop by drop into a 72 mL of NaCl solution (0.1 mol L<sup>-1</sup>) under vigorous magnetic stirring. After being stirred for 60 min, the resultant powder was filtrated, rinsed, and dried. This sample is denoted as AgCl.

#### **1.2 Preparation of CoPi/AgCl**

CoPi/AgCl photocatalyst was prepared by photochemical deposition. AgCl powder was immersed in 0.05 mol L<sup>-1</sup> Co(NO<sub>3</sub>)<sub>2</sub> and 0.1 mol L<sup>-1</sup> potassium phosphate electrolyte (pH=7), and illuminated 350 W Xenon lamp with a UV-cutoff filter ( $\lambda > 400$  nm) as a visible-light source illuminated (40 mW cm<sup>-2</sup>) samples for 10 min. The amount of Co-Pi solution was controlled to be 0.3 wt% and the resulting product will be referred to as CoPi/AgCl (0.3wt%).

#### **1.3 Preparation of CoPi/AgCl (0.3wt%-H)**

To investigate the effect of Co-Pi cocatalyst on the photocatalytic performance and structure of CoPi/AgCl, the Co-Pi cocatalyst was removed by dispersing 0.05 g of CoPi/AgCl (0.3wt%) photocatalyst into a 20 mL of hydrochloric acid solution (1 mol

L<sup>-1</sup>) at room temperature for 60 min. After filtration, washing with distilled water and drying, the resulting product was referred to as CoPi/AgCl (0.3wt%-H).

## **2 Co(II)/Ag<sub>3</sub>PO<sub>4</sub>, and Pi/Ag<sub>3</sub>PO<sub>4</sub>**

### **2.1 Preparation of Co(II)/Ag<sub>3</sub>PO<sub>4</sub>(0.3wt%)**

Co(II) cocatalyst modified Ag<sub>3</sub>PO<sub>4</sub> photocatalyst was prepared by *in situ* photochemical deposition. 0.5 g of Ag<sub>3</sub>PO<sub>4</sub> powder was immersed in the 0.5 mL of Co(NO<sub>3</sub>)<sub>2</sub> (0.05 mol L<sup>-1</sup>), and 350 W Xenon lamp with a UV-cutoff filter ( $\lambda > 400$  nm) as a visible-light source illuminated for 10 min. This sample referred to as Co(II)/Ag<sub>3</sub>PO<sub>4</sub>(0.3wt%).

### **2. 2 Preparation of Pi/Ag<sub>3</sub>PO<sub>4</sub>(0.3wt%)**

Pi cocatalyst modified Ag<sub>3</sub>PO<sub>4</sub> photocatalyst was prepared by photochemical deposition. 0.5 g of Ag<sub>3</sub>PO<sub>4</sub> powder was immersed in 100 mL of phosphoric acid buffer solution, and 350 W Xenon lamp with a UV-cutoff filter ( $\lambda > 400$  nm) as a visible-light source illuminated for 10 min. This sample referred to as Pi/Ag<sub>3</sub>PO<sub>4</sub>(0.3wt%).

### **2. 3 Adsorption ability**

The evaluation of adsorption ability of the prepared samples for MO solution was performed. Typically, 100 mg of the sample was dispersed into 20 mL of MO solution

(20 mg L<sup>-1</sup>) in a disk with a diameter of ca. 10 cm. At certain time intervals (30 min), the concentration of MO solution was measured. The adsorption ability may be expressed as  $c/c_0$ , where  $c_0$  and  $c$  are the initial concentrations and the concentrations, respectively.

## Figure captions

Fig. S1 (A) FESEM image, and (B) EDX of CoPi/AgCl(0.3wt%); (C) FESEM image, and (D) EDX of CoPi/AgCl(0.3wt%-H); (E) XPS spectra of (a) AgCl, (b) CoPi/AgCl (0.3wt%) and (c) CoPi/AgCl (0.3wt%-H); (F) Photocatalytic degradation of MO for (a) AgCl, (b) CoPi/AgCl (0.3wt%) and (c) CoPi/AgCl (0.3wt%-H).

Fig. S2 XPS spectra of (A) survey; (B) Co, (C) P, and (D) O element of different samples: (a)  $\text{Ag}_3\text{PO}_4$ , (b)  $\text{Co(II)/Ag}_3\text{PO}_4(0.3\text{wt}\%)$ , (c)  $\text{Pi/Ag}_3\text{PO}_4(0.3\text{wt}\%)$ , and (d)  $\text{CoPi/Ag}_3\text{PO}_4(0.3\text{wt}\%)$ .

Fig. S3 The adsorption ability of different samples for MO: (a)  $\text{Ag}_3\text{PO}_4$ , (b)  $\text{Co(II)/Ag}_3\text{PO}_4(0.3\text{wt}\%)$ , (c)  $\text{Pi/Ag}_3\text{PO}_4(0.3\text{wt}\%)$ , and (d)  $\text{CoPi/Ag}_3\text{PO}_4(0.3\text{wt}\%)$ .

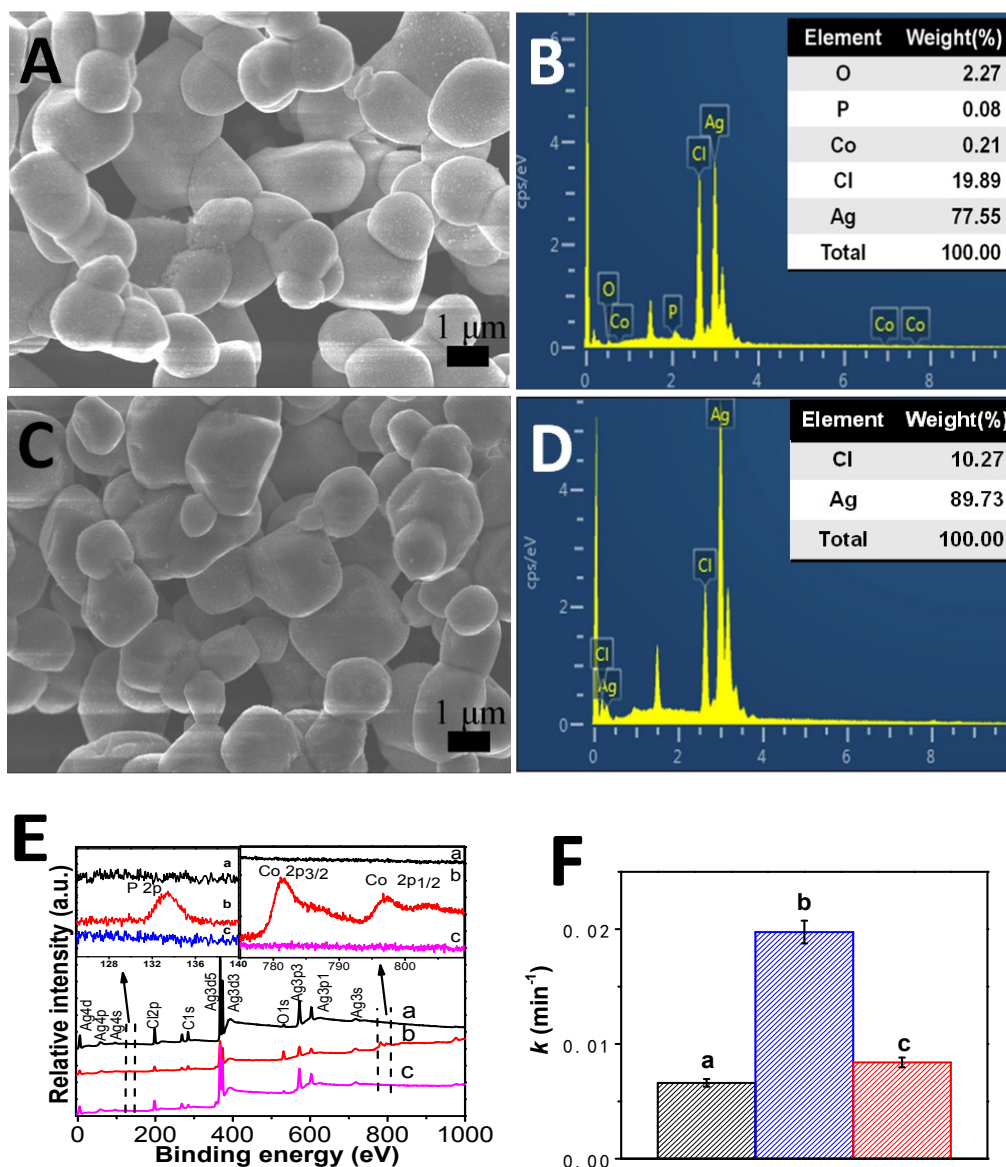

Fig. S1 (A) FESEM image, and (B) EDX of CoPi/AgCl(0.3wt%); (C) FESEM image, and (D) EDX of CoPi/AgCl(0.3wt%-H); (E) XPS spectra of (a) AgCl, (b) CoPi/AgCl (0.3wt%) and (c) CoPi/AgCl (0.3wt%-H); (F) Photocatalytic degradation of MO for (a) AgCl, (b) CoPi/AgCl (0.3wt%) and (c) CoPi/AgCl (0.3wt%-H).

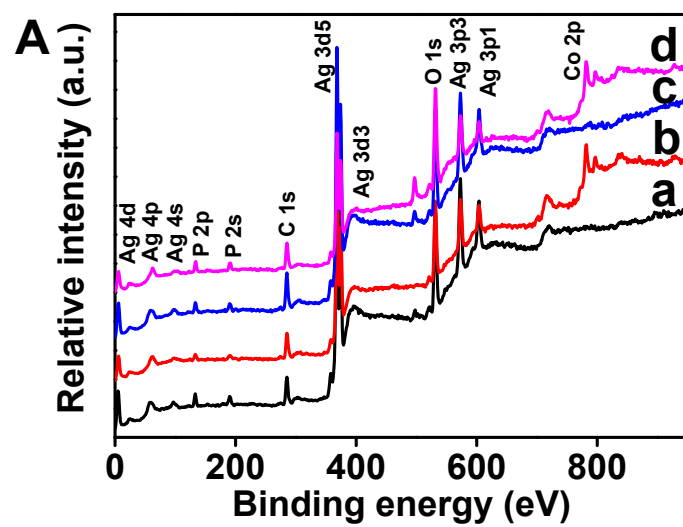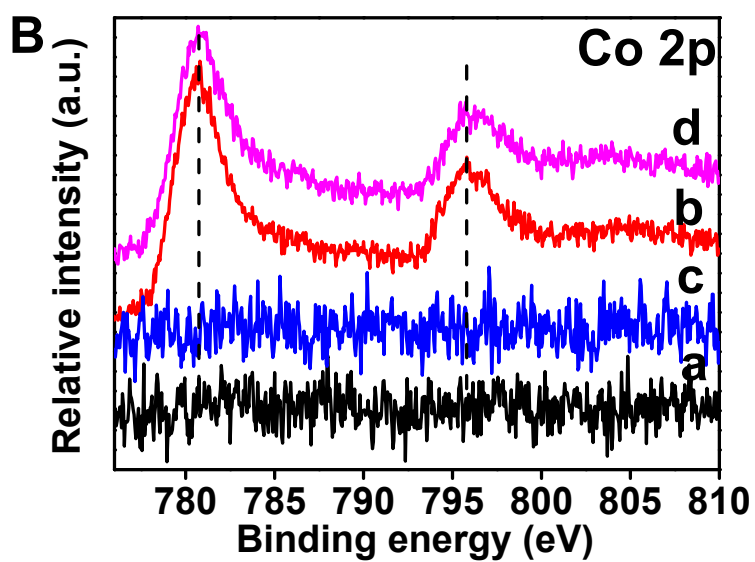

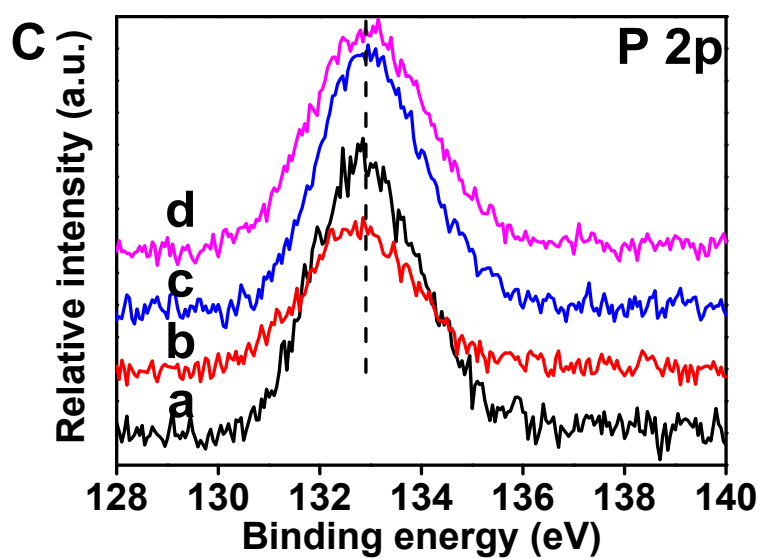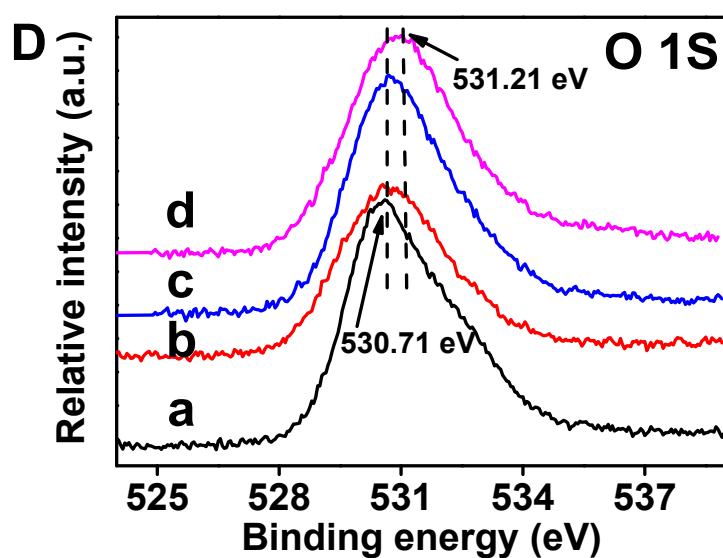

Fig.S2 XPS spectra of (A) survey; (B) Co, (C) P, and (D) O element of different samples: (a)  $\text{Ag}_3\text{PO}_4$ , (b)  $\text{Co(II)/Ag}_3\text{PO}_4(0.3\text{wt}\%)$ , (c)  $\text{Pi/Ag}_3\text{PO}_4(0.3\text{wt}\%)$ , and (d)  $\text{CoPi/Ag}_3\text{PO}_4(0.3\text{wt}\%)$ .



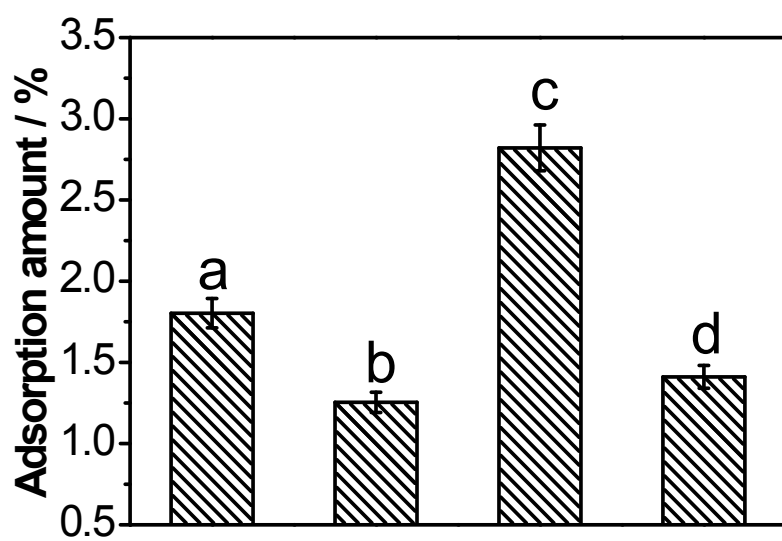

Fig.S3 The adsorption ability of different samples for MO: (a)  $\text{Ag}_3\text{PO}_4$ , (b)  $\text{Co(II)/Ag}_3\text{PO}_4(0.3\text{wt}\%)$ , (c)  $\text{Pi/Ag}_3\text{PO}_4(0.3\text{wt}\%)$ , and (d)  $\text{CoPi/Ag}_3\text{PO}_4(0.3\text{wt}\%)$ .
